# Supplementary material
Source: Springer Nature journal article supplement (https://www.springermedizin.de/resource/supplementary/12885_2001_10_MOESM1_ESM.pdf/9460004)

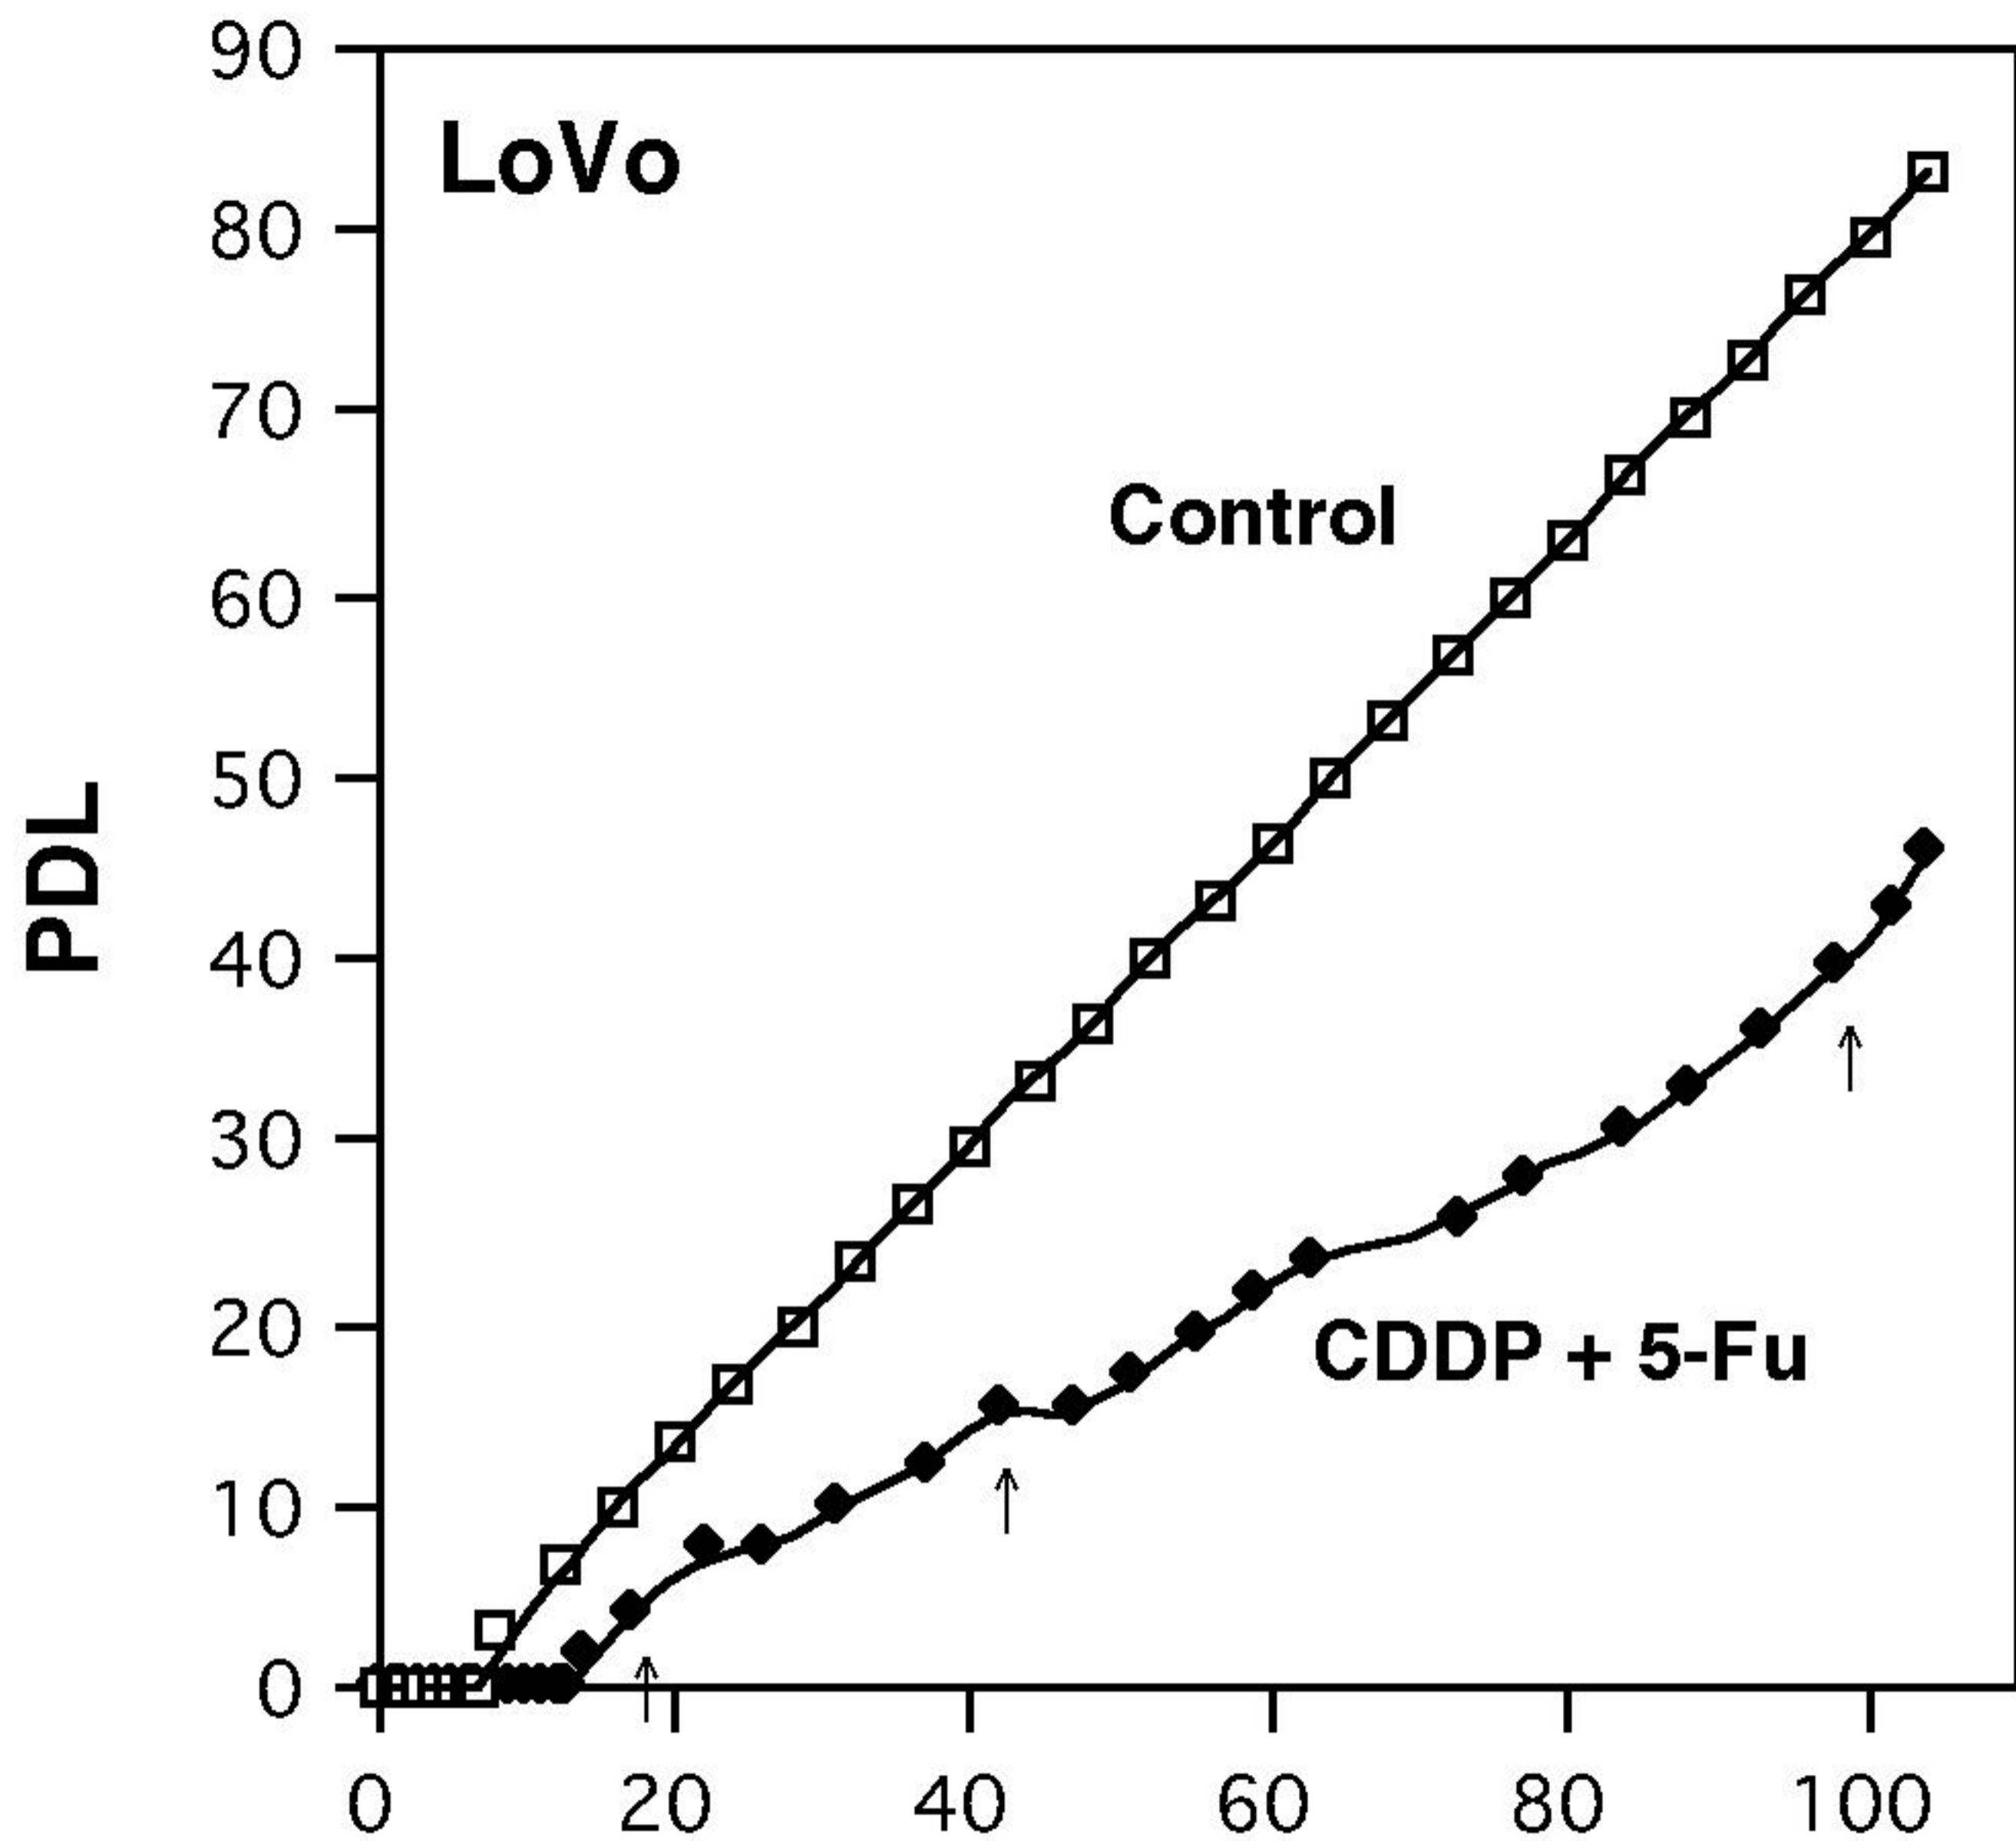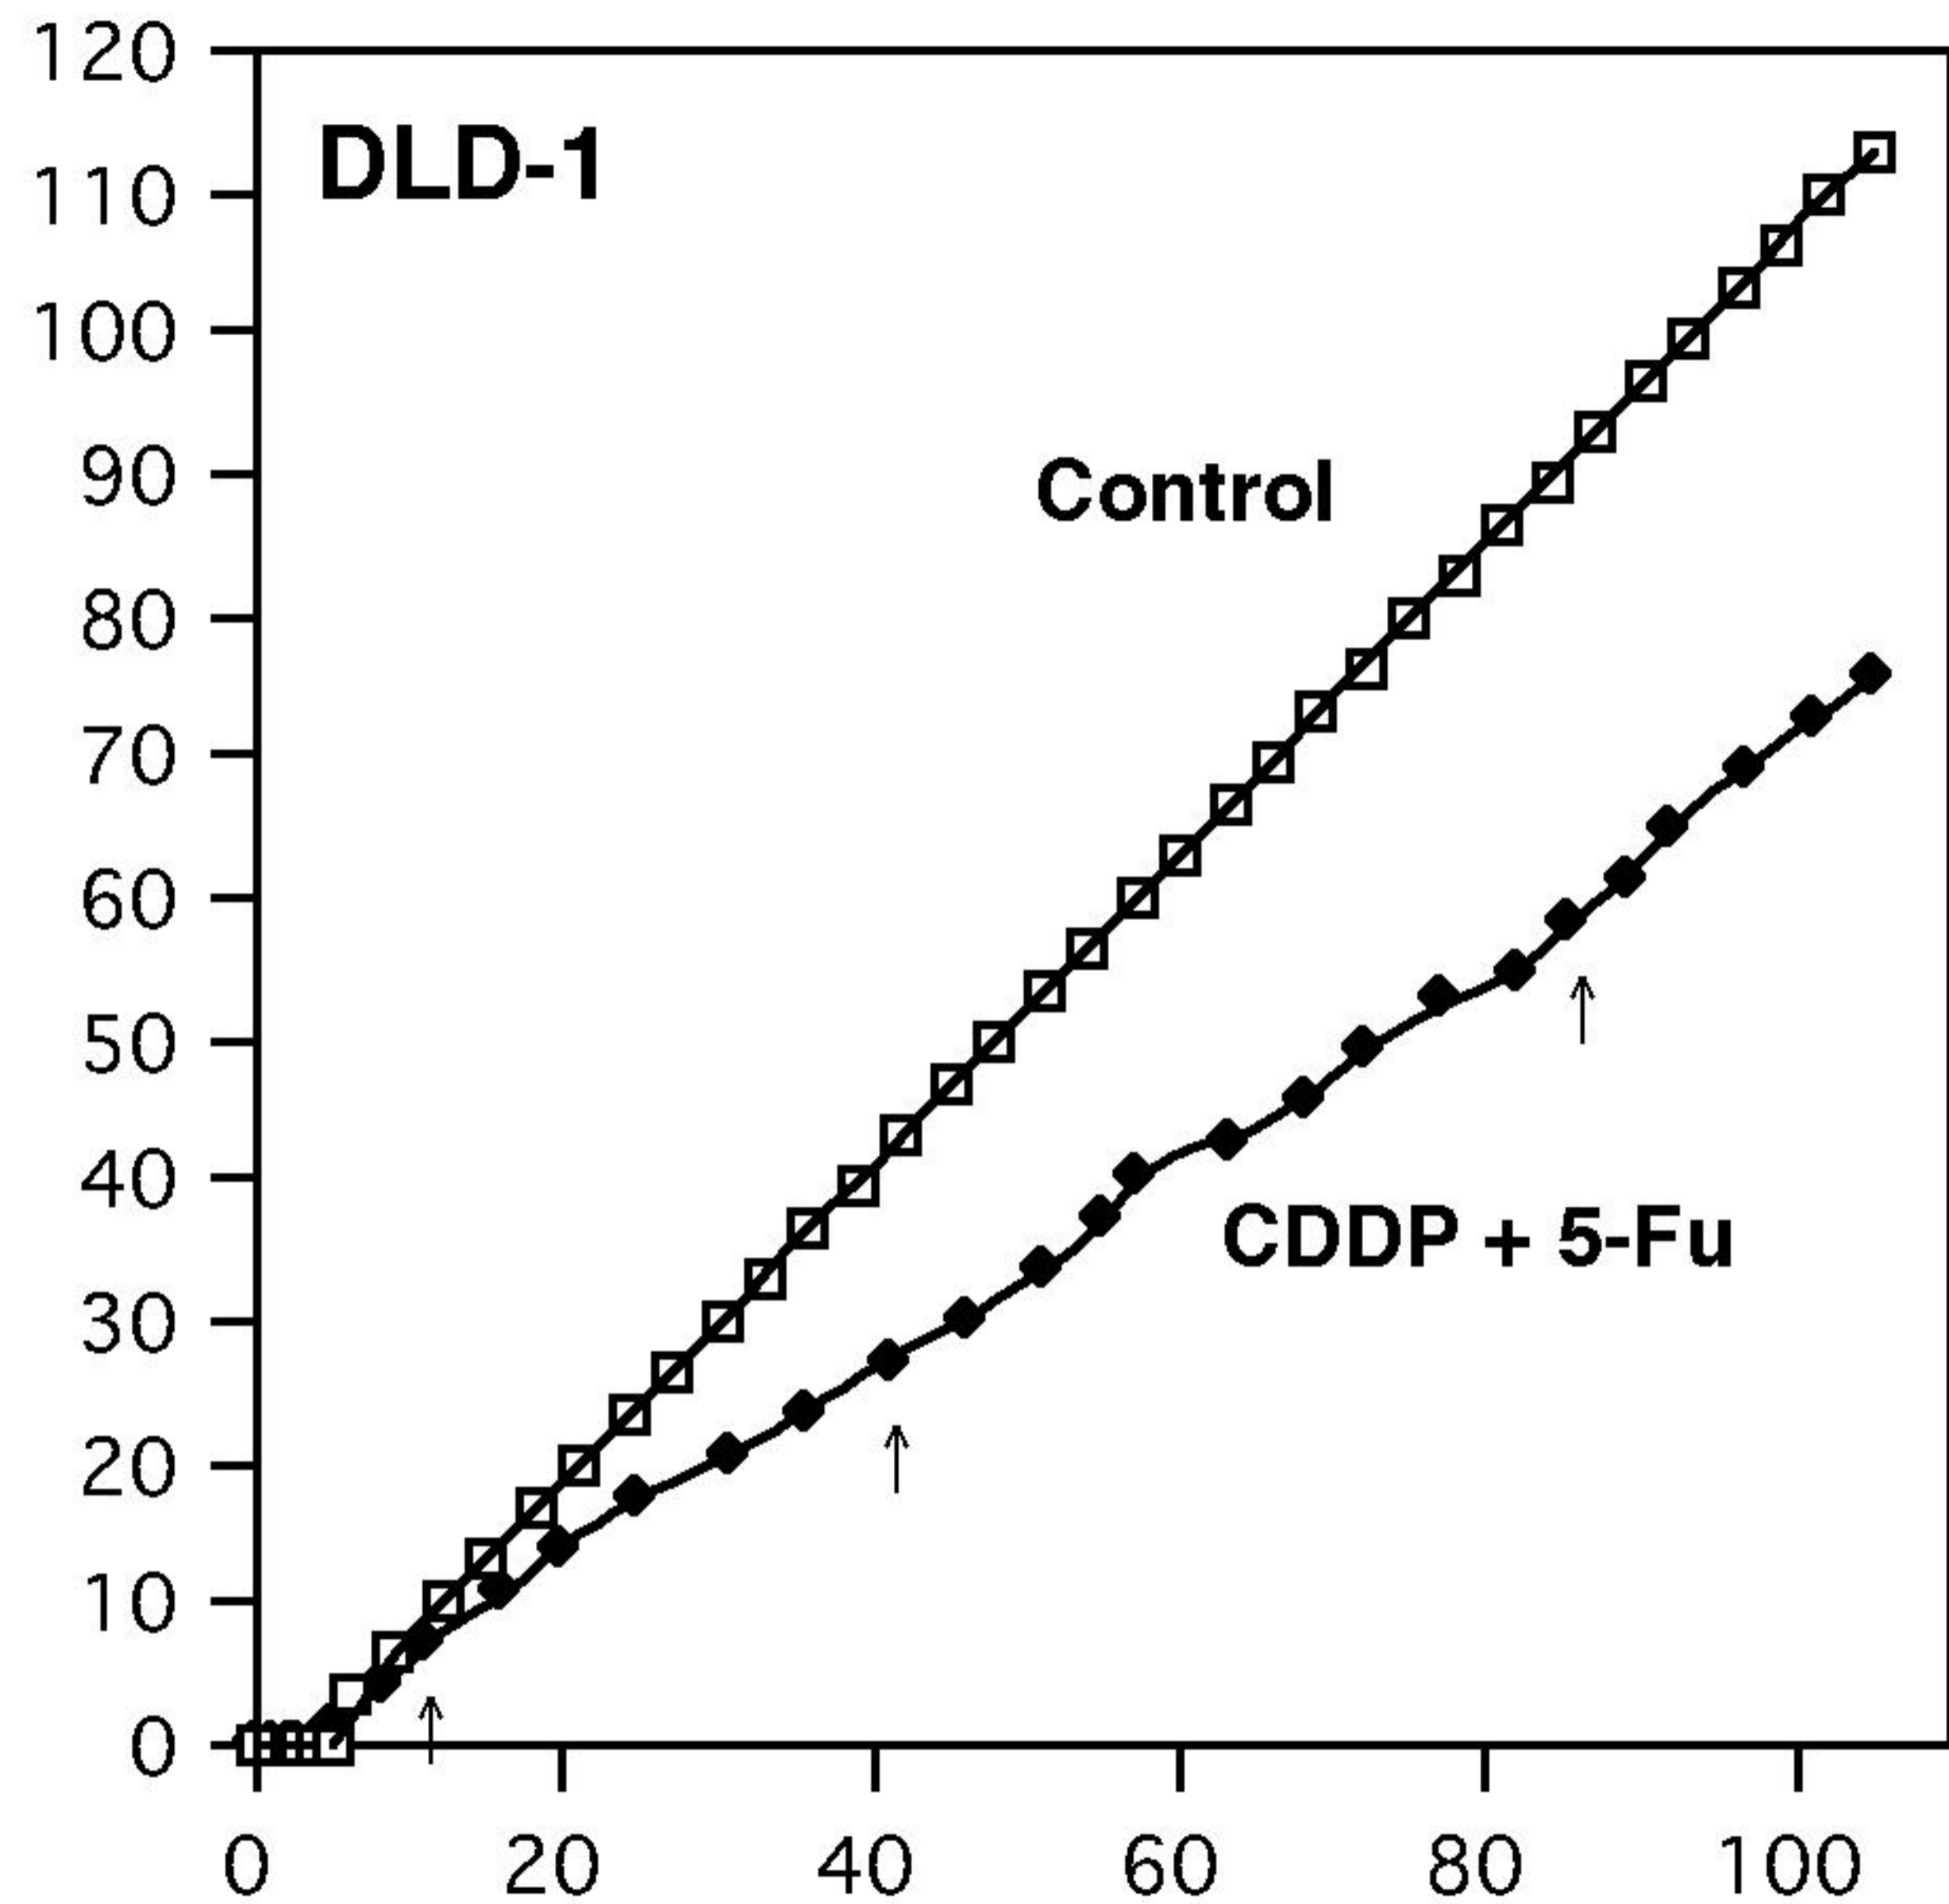

**Days of culture**

Supplement: MOESM1 [file 9460004]
